# Supplementary material
Source: publisher site journal article supplement (https://en-cdn.bio-protocol.org/attached/file/20191022/Supplemental%20file.docx)
Supplement: Supplementary file 1 [file Supplemental%20file.docx]

**Sequences**

For fusion proteins incorporating VIP tags, we adopted a standardized naming convention. This N-to-C naming convention indicates the position of the tag in the name. For example, a C-terminal fusion of CoilE to Protein X will be named “ProteinX-CoilE” while an N-terminal fusion would be named “CoilE-ProteinX”. An intragenic fusion between two domains, Protein X and Protein Y, would be named “ProteinX-CoilE-ProteinY”.

*The amino acid sequence of CoilR expressed from pET28b(+)_CoilR (7502.35 Da) is:*

MGGS **LEIR AAFLRQR NTALRTE VAELEQE VQRLENE VSQYETR YGPL**GGGAAALGCLAAALE*HHHHHH*

Sequence Key: **CoilR**, conjugation handle, *hexa-histidine tag for purification*

*The pcDNA3.1_TfR1-CoilE vector encodes TfR1 with a C-terminal CoilE tag (TfR1-CoilE). The amino acid sequence is:*

MMDQARSAFSNLFGGEPLSYTRFSLARQVDGDNSHVEMKLAADEEENADNNMKASVRKPKRFNGRLCFAAIALVIFFLIGFMSGYLGYCKRVEQKEECVKLAETEETDKSETMETEDVPTSSRLYWADLKTLLSEKLNSIEFADTIKQLSQNTYTPREAGSQKDESLAYYIENQFHEFKFSKVWRDEHYVKIQVKSSIGQNMVTIVQSNGNLDPVESPEGYVAFSKPTEVSGKLVHANFGTKKDFEELSYSVNGSLVIVRAGEITFAEKVANAQSFNAIGVLIYMDKNKFPVVEADLALFGHAHLGTGDPYTPGFPSFNHTQFPPSQSSGLPNIPVQTISRAAAEKLFGKMEGSCPARWNIDSSCKLELSQNQNVKLIVKNVLKERRILNIFGVIKGYEEPDRYVVVGAQRDALGAGVAAKSSVGTGLLLKLAQVFSDMISKDGFRPSRSIIFASWTAGDFGAVGATEWLEGYLSSLHLKAFTYINLDKVVLGTSNFKVSASPLLYTLMGKIMQDVKHPVDGKSLYRDSNWISKVEKLSFDNAAYPFLAYSGIPAVSFCFCEDADYPYLGTRLDTYEALTQKVPQLNQMVRTAAEVAGQLIIKLTHDVELNLDYEMYNSKLLSFMKDLNQFKTDIRDMGLSLQWLYSARGDYFRATSRLTTDFHNAEKTNRFVMREINDRIMKVEYHFLSPYVSPRESPFRHIFWGSGSHTLSALVENLKLRQKNITAFNETLFRNQLALATWTIQGVANALSGDIWNIDNEF*GSGSGSTG*M**LEIEAAFLERENTALETRVAELRQRVQRLRNRVSQYRTRYGPL***GGG*CLETG

Key: **CoilE**, *linker*

*The mEmerald-CoilE-actin-C18 was made by inserting the CoilE sequence into mEmerald-actin-C18 (Addgene, #53978), as described 30. The amino acid sequence for mEmerald-CoilE-actin-C18 is:*

MVSKGEELFTGVVPILVELDGDVNGHKFSVSGEGEGDATYGKLTLKFICTTGKLPVPWPTLVTTLTYGVQCFARYPDHMKQHDFFKSAMPEGYVQERTIFFKDDGNYKTRAEVKFEGDTLVNRIELKGIDFKEDGNILGHKLEYNYNSHKVYITADKQKNGIKVNFKTRHNIEDGSVQLADHYQQNTPIGDGPVLLPDNHYLSTQSKLSKDPNEKRDHMVLLEFVTAAGITLGMDELYK*SGLRS*M**LEIEAAFLERENTALETRVAELRQRVQRLRNRVSQYRTRYGPL***GGGRSGSGGGSASGGSGS*DDDIAALVVDNGSGMCKAGFAGDDAPRAVFPSIVGRPRHQGVMVGMGQKDSYVGDEAQSKRGILTLKYPIEHGIVTNWDDMEKIWHHTFYNELRVAPEEHPVLLTEAPLNPKANREKMTQIMFETFNTPAMYVAIQAVLSLYASGRTTGIVMDSGDGVTHTVPIYEGYALPHAILRLDLAGRDLTDYLMKILTERGYSFTTTAEREIVRDIKEKLCYVALDFEQEMATAASSSSLEKSYELPDGQVITIGNERFRCPEALFQPSFLGMESCGIHETTFNSIMKCDVDIRKDLYANTVLSGGTTMYPGIADRMQKEITALAPSTMKIKIIAPPERKYSVWIGGSILASLSTFQQMWISKQEYDESGPSIVHRKCF

Key: mEmerald, **CoilE**, *linker*
